# Supplementary material
Source: HighWire-hosted journal article supplement (https://www.annfammed.org/highwire/filestream/8259/field_highwire_adjunct_files/1/Alshamsan_Supp_Tables_1-2.pdf)
Supplement: Alshamsan_Supp_Tables_1-2.pdf [file Alshamsan_Supp_Tables_1-2.pdf]

**Online Supplementary Material**

Alshamsan R, Lee J, Majeed A, Netuveli G, Millett C. Effect of a UK pay for performance program on ethnic disparities in diabetes outcomes: interrupted time series analysis. *Ann Fam Med.* 2012;10(3):228-234.

<http://www.annfammed.org/content/full/10/3/228>

| <b>Supplemental Table 1. Results of the Sensitivity Analysis for Blood Pressure</b> |                            |                              |                            |                              |
|-------------------------------------------------------------------------------------|----------------------------|------------------------------|----------------------------|------------------------------|
| <b>Parameter</b>                                                                    | <b>Systolic</b>            |                              | <b>Diastolic</b>           |                              |
|                                                                                     | <b>Heckman Coefficient</b> | <b>Selection Coefficient</b> | <b>Heckman Coefficient</b> | <b>Selection Coefficient</b> |
| Baseline trend                                                                      | -0.320                     | 0.208 <sup>b</sup>           | -1.044 <sup>a</sup>        | 0.208 <sup>a</sup>           |
| Level change                                                                        | -2.133 <sup>a</sup>        | 0.192 <sup>a</sup>           | -0.640 <sup>a</sup>        | 0.192 <sup>a</sup>           |
| Trend change                                                                        | -0.838 <sup>a</sup>        | -0.0493 <sup>a</sup>         | 0.331 <sup>b</sup>         | -0.0503 <sup>a</sup>         |
| Rho (standard error)                                                                |                            | -0.220 (0.033)               |                            | -0.261 (0.036)               |
| P value for LR test                                                                 |                            | .001                         |                            | .001                         |

LR = likelihood ratio.  
<sup>a</sup> Indicates significance at the 1% level.  
<sup>b</sup> Indicates significance at the 5% level.

| <b>Supplemental Table 2. Results of the Sensitivity Analysis for Hemoglobin A<sub>1c</sub> and Cholesterol</b> |                            |                              |                            |                              |
|----------------------------------------------------------------------------------------------------------------|----------------------------|------------------------------|----------------------------|------------------------------|
| <b>Parameter</b>                                                                                               | <b>HbA<sub>1c</sub></b>    |                              | <b>Cholesterol</b>         |                              |
|                                                                                                                | <b>Heckman Coefficient</b> | <b>Selection Coefficient</b> | <b>Heckman Coefficient</b> | <b>Selection Coefficient</b> |
| Baseline trend                                                                                                 | -0.228 <sup>a</sup>        | 0.262 <sup>a,b</sup>         | -0.123 <sup>a</sup>        | 0.284 <sup>a</sup>           |
| Level change                                                                                                   | 0.204                      | 0.199 <sup>a</sup>           | -0.132 <sup>a</sup>        | 0.210 <sup>a</sup>           |
| Trend change                                                                                                   | 0.223                      | -0.193 <sup>a</sup>          | 0.035 <sup>b</sup>         | -0.197 <sup>a</sup>          |
| Rho (standard error)                                                                                           |                            | -0.022 (0.036)               |                            | -0.024 (0.048)               |
| P value for LR test                                                                                            |                            | .563                         |                            | .627                         |

HbA<sub>1c</sub> = hemoglobin A<sub>1c</sub>; LR = likelihood ratio.  
<sup>a</sup> Indicates significance at the 1% level.  
<sup>b</sup> Indicates significance at the 5% level.

**References**

1. Puhani. P. The Heckman correction for sample selection and its critique. *J Econ Surv.* 2000;14(1):53-68.
2. Wooldridge J. *Econometric Analysis of Cross Section and Panel Data.* 2nd ed. Cambridge, MA: MIT Press; 2010.
